# Supplementary material for: A pilot study of routine quality control of sampling by the SAD method, applied to packaged and bulk foodsElectronic supplementary information (ESI) available: 25 SAD charts. See http://www.rsc.org/suppdata/an/b3/b315644n/
Source: Royal Society of Chemistry journal article supplement (doi:10.1039/b315644n), 2004-01-01

### SAD charts for with sampling events in sequential order.

In all of these plots, sampling events with negative indices are the arbitrarily defined training set, while those with positive indices are the training set. “A” and “W” indicate the action limits and warning limits respectively.

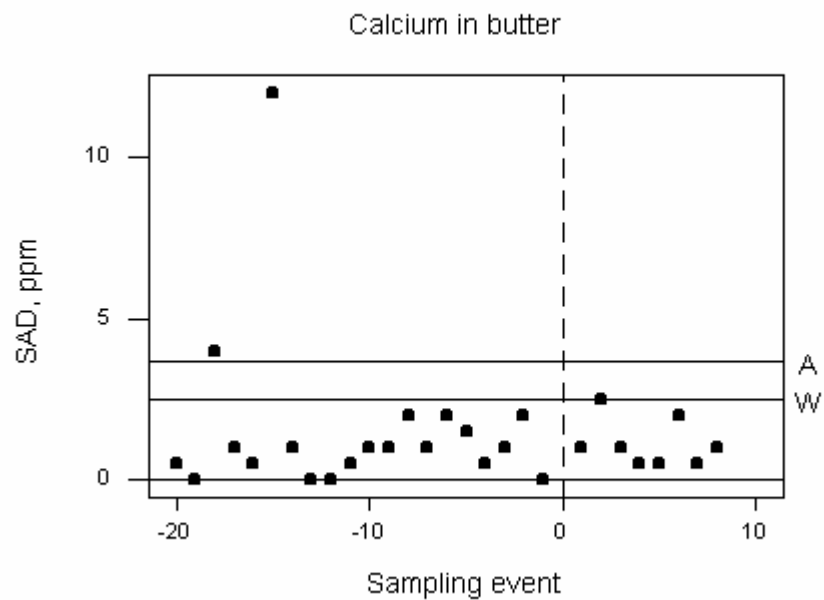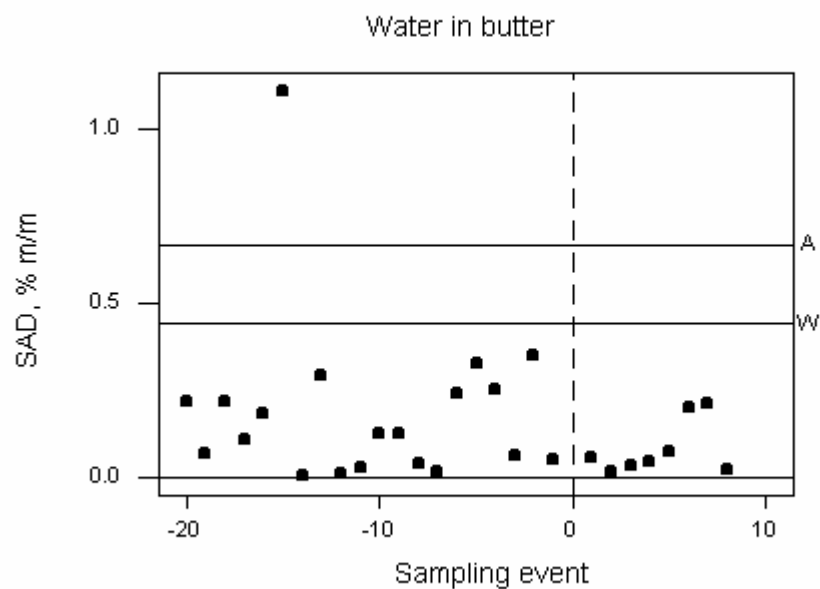

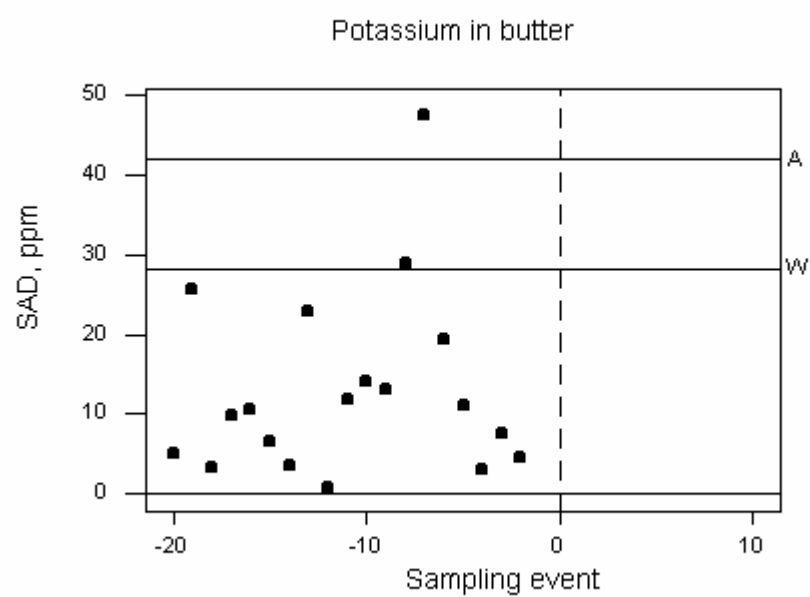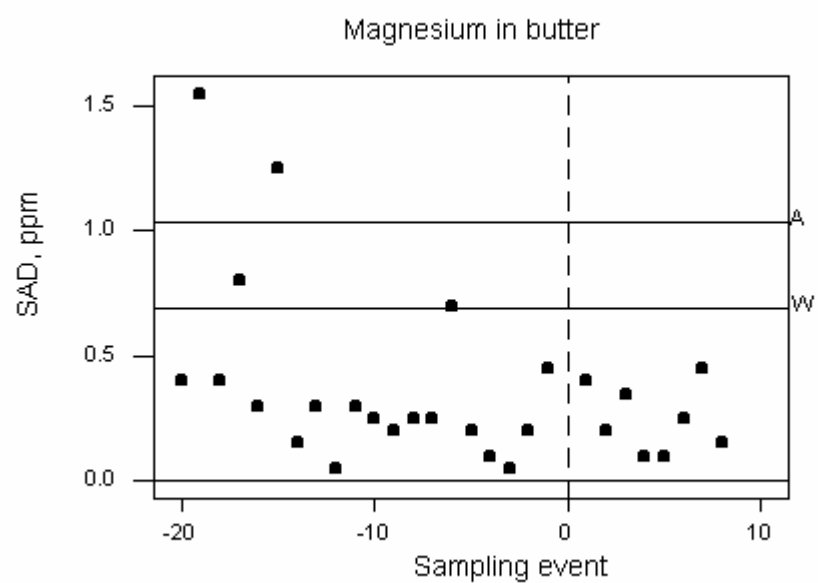

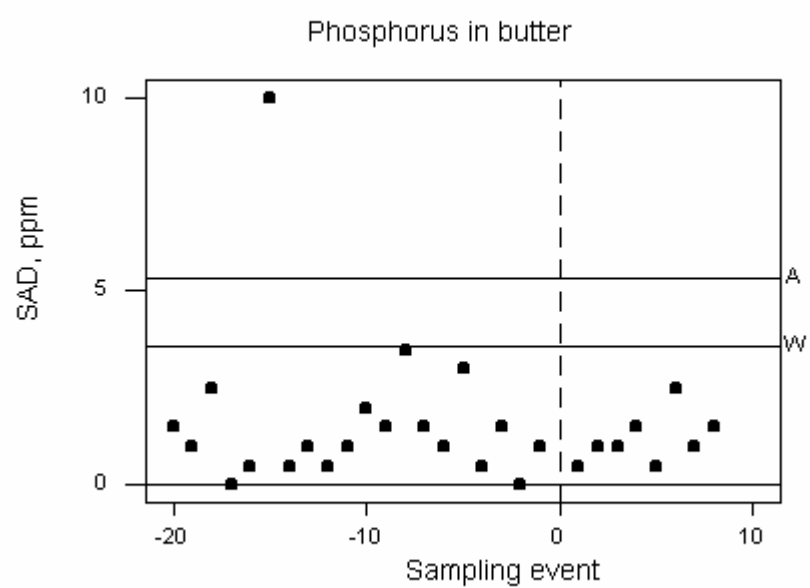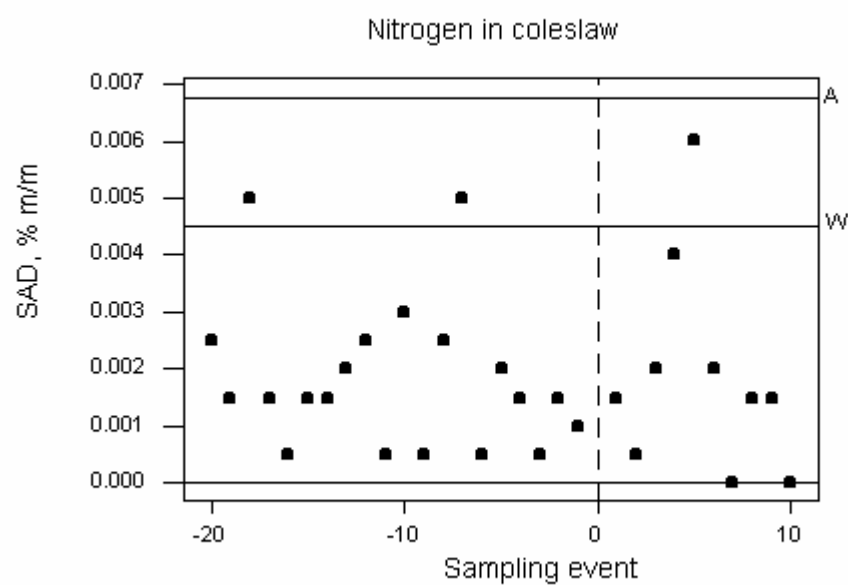

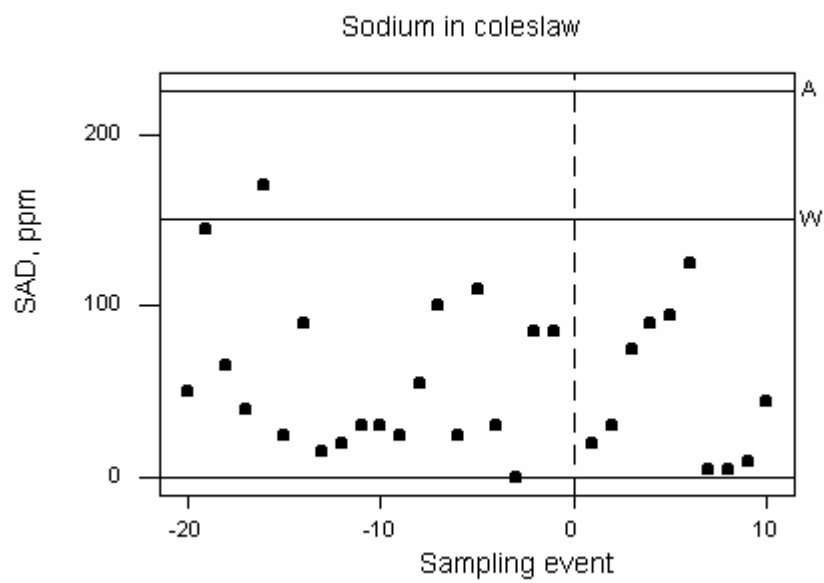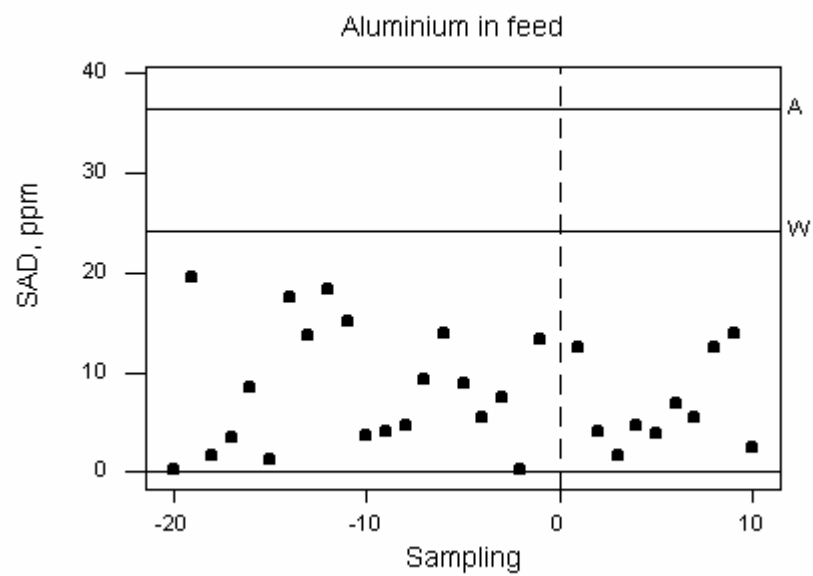

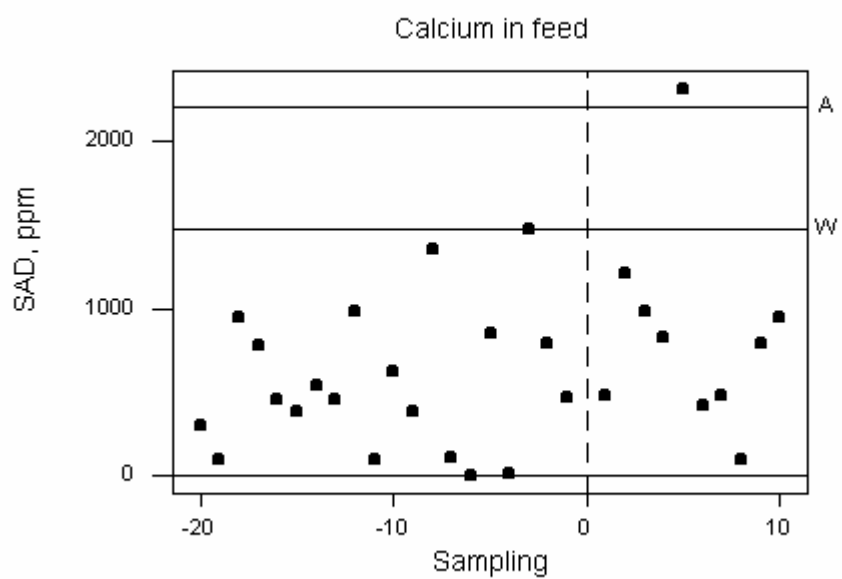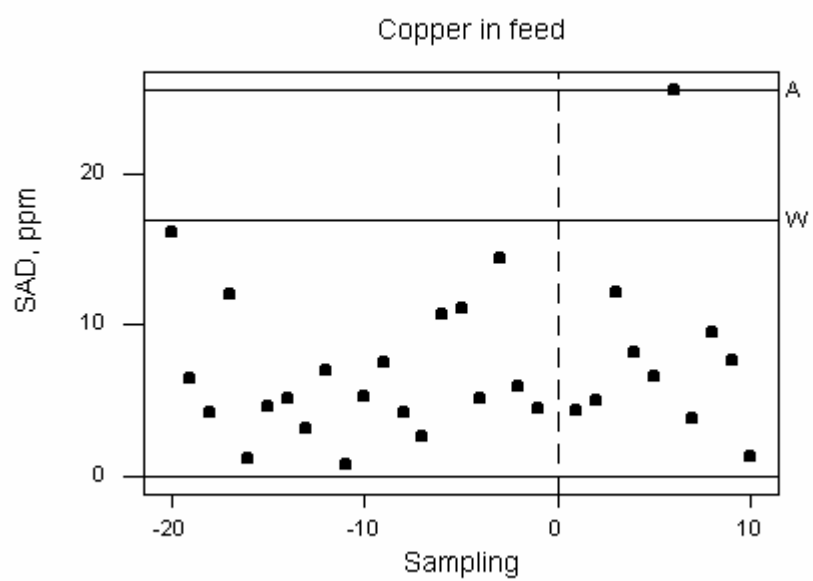

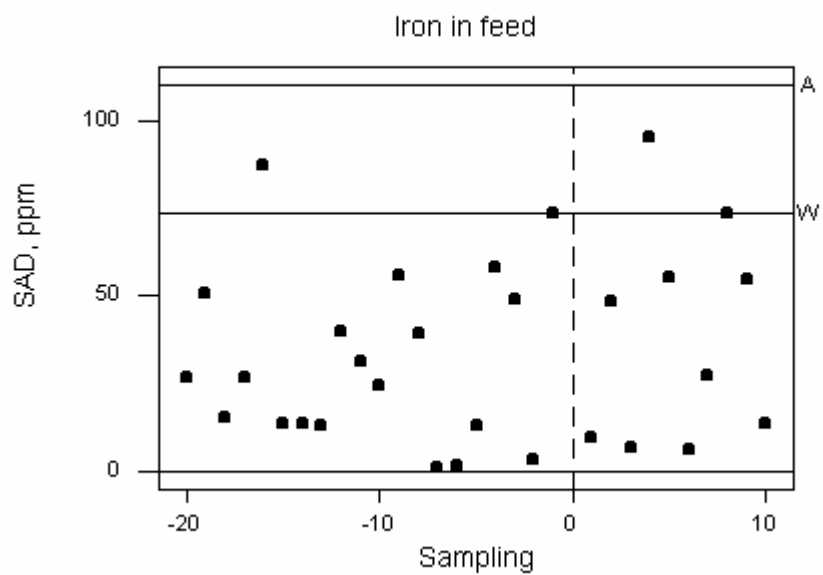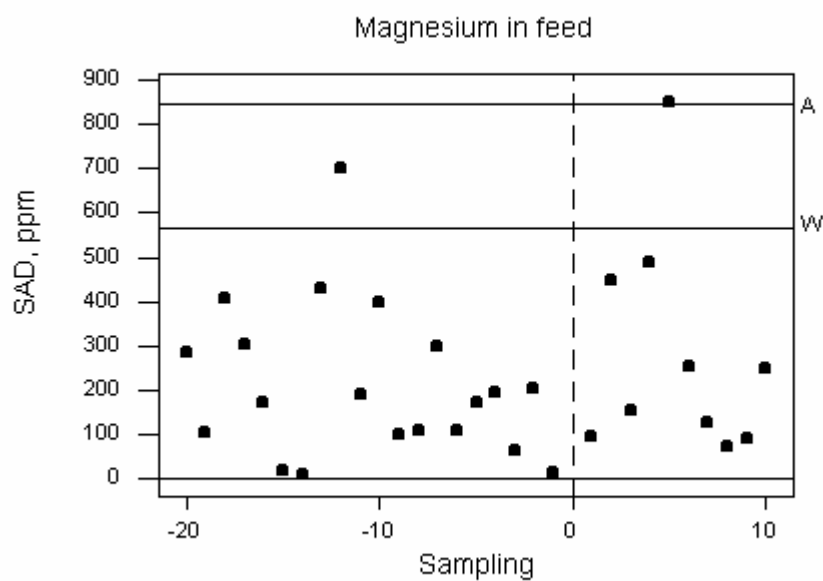

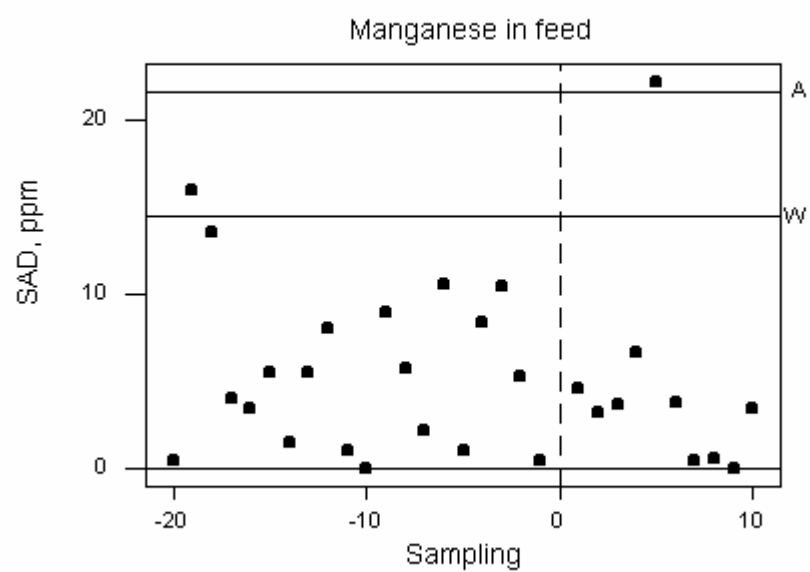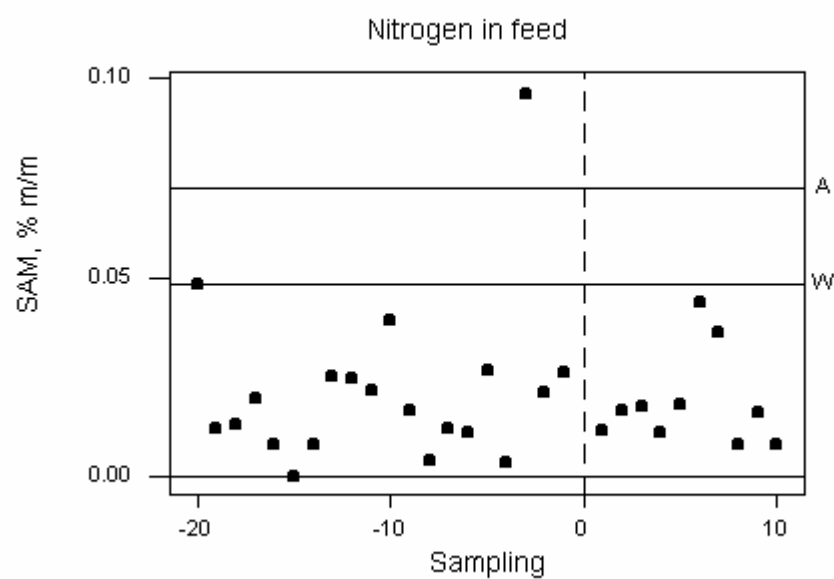

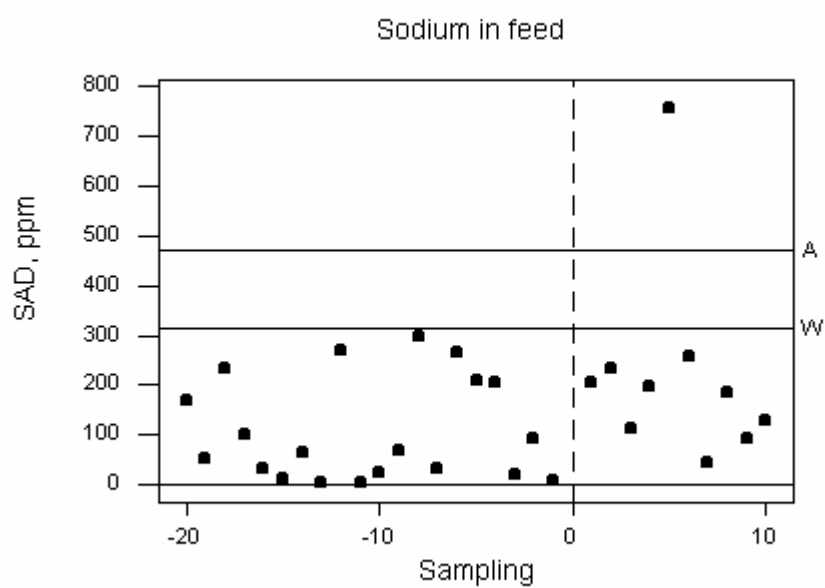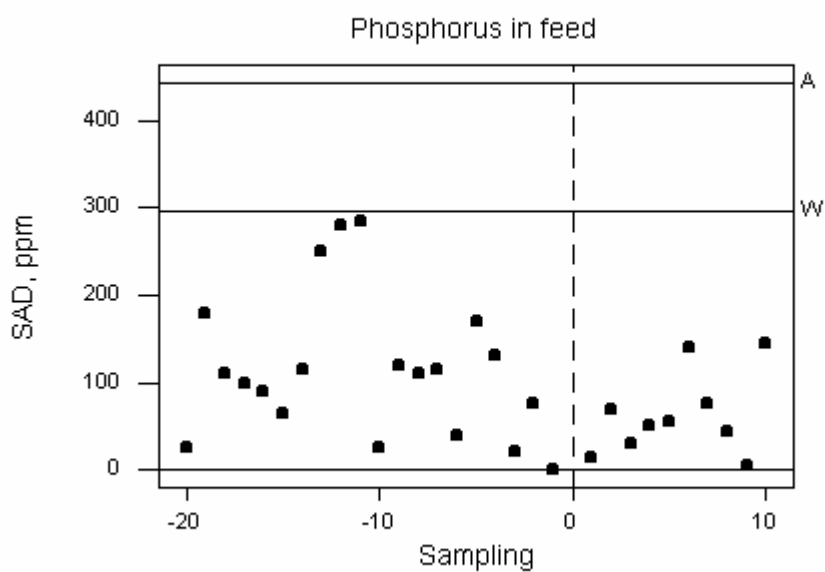



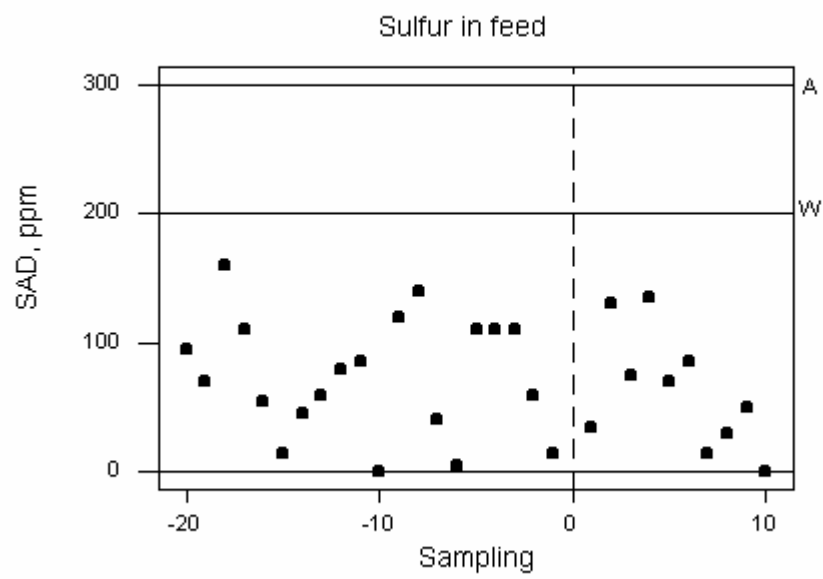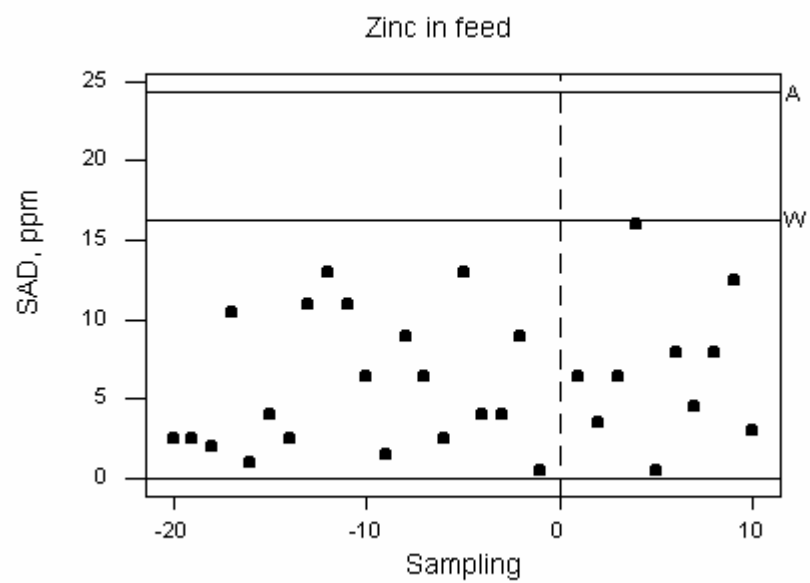

Mercury in tuna

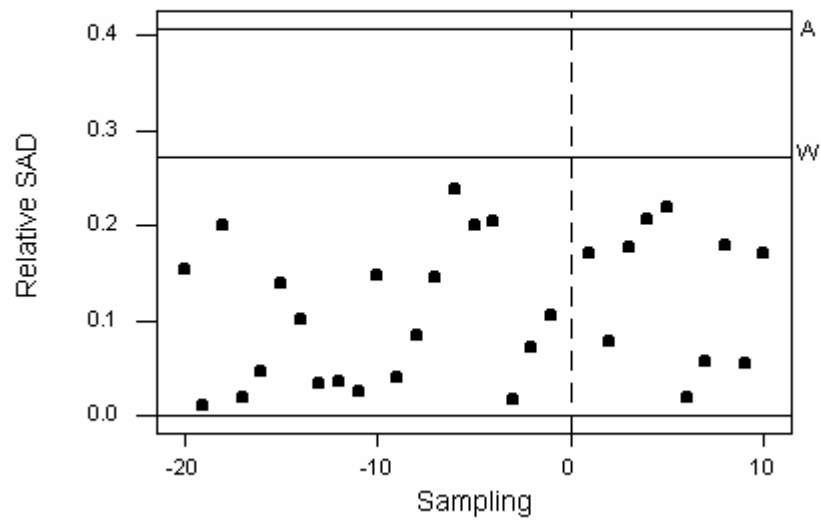

Zinc in tuna

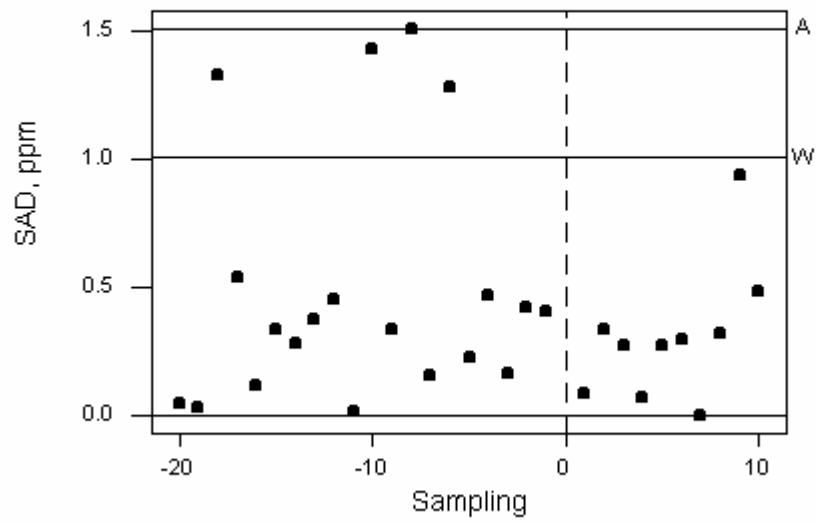

Calcium in water, anomalous  
sampling events deleted.

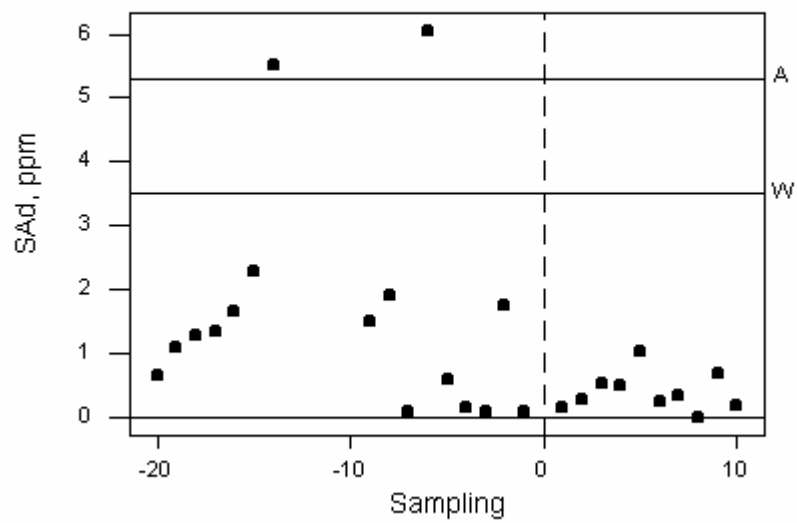

Calcium in water, all data included. Anomalous samplings  
in the training set have inflated the control limits unduly

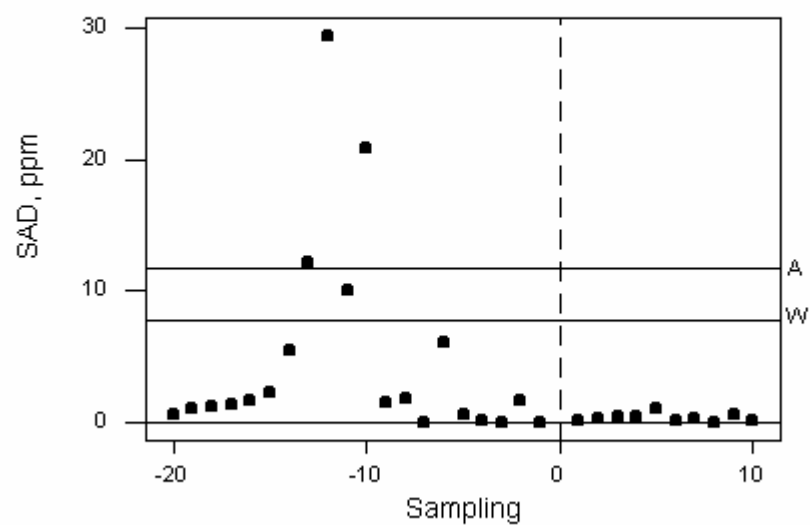

Potassium in water

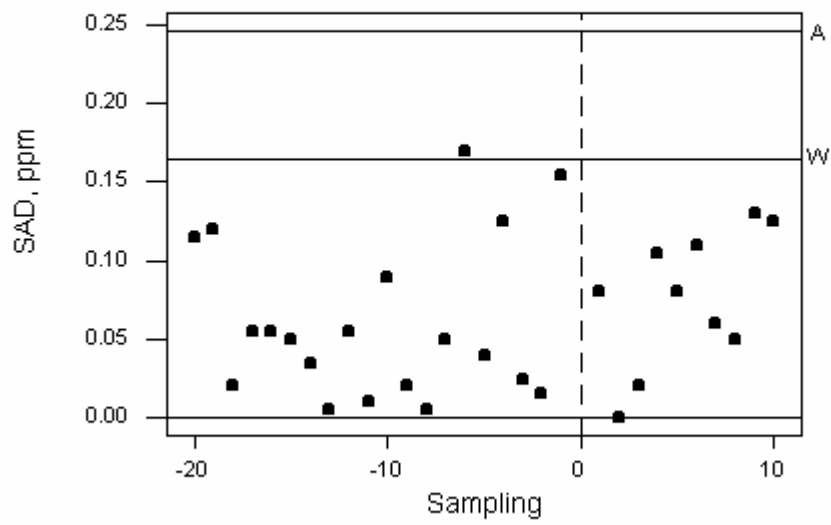

Magnesium in water

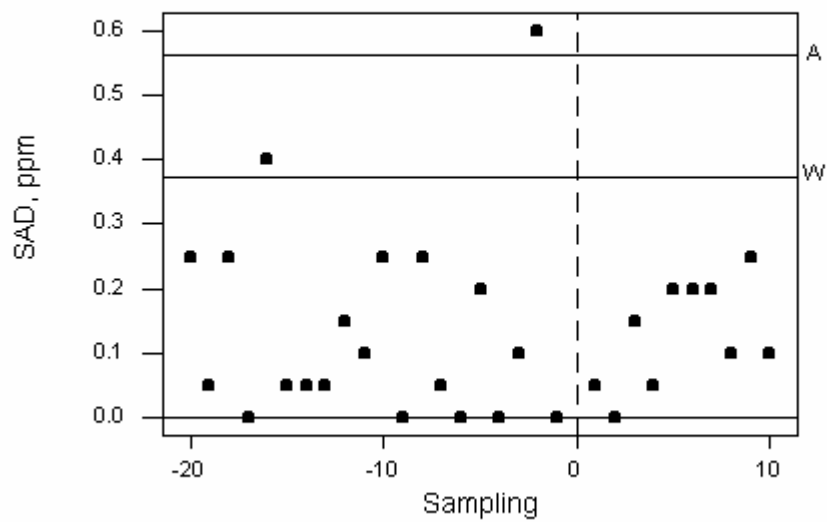

Sodium in water

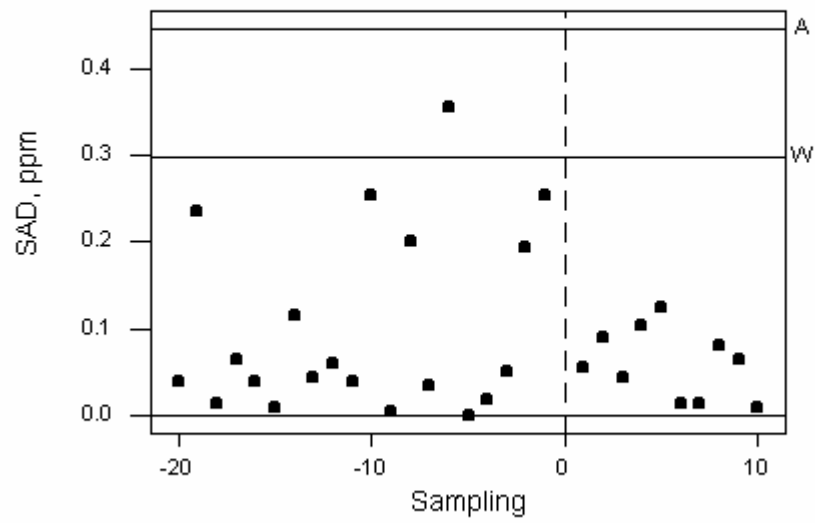

Nitrate in water

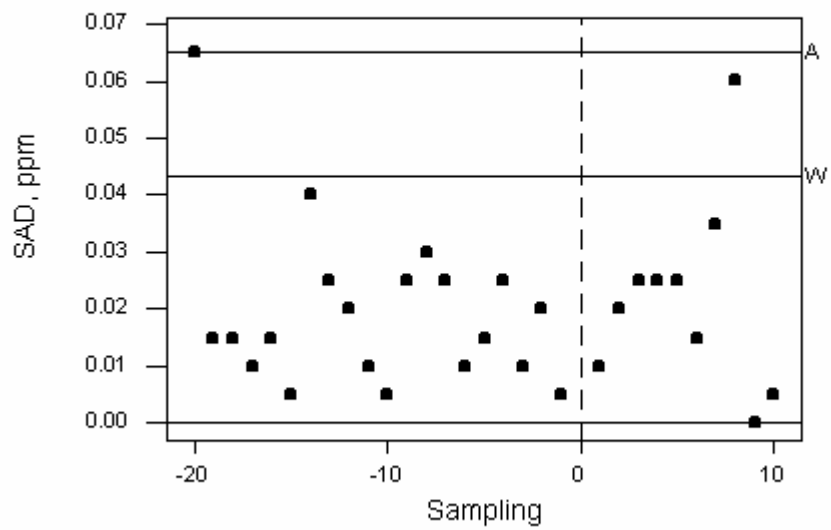

Simulated heteroscedastic data, some results  
near detection limit of analytical method

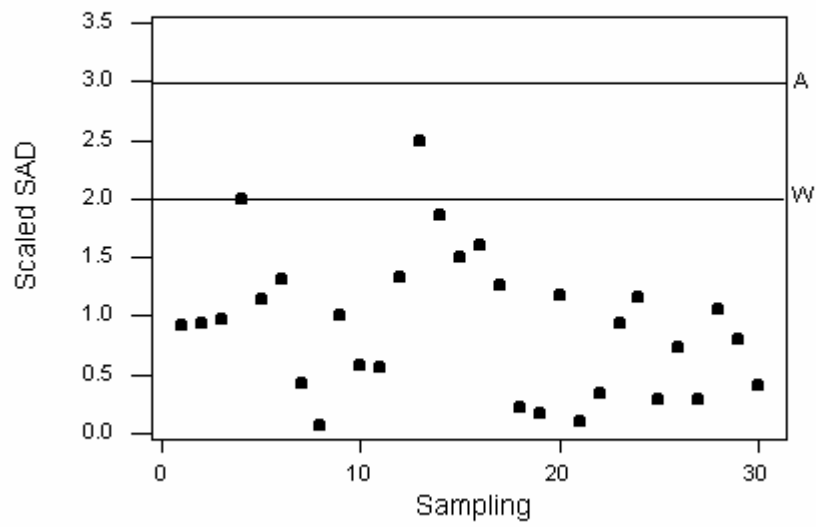

Supplement: b315644n.pdf [file b315644n.pdf]
